# Supplementary material
Source: publisher figshare collection journal article supplement (https://acs.figshare.com/ndownloader/files/38314451)
Supplement: Supplementary file 1 [file 38314451]

**Highly efficient Pd@CN catalysts with quasi-ordered mesopores synthesized  
from recycled mother liquid of ZIFs**

Liu Yang,<sup>a</sup> Zhengyan Qu,<sup>a</sup> Yanhua Shao,<sup>a</sup> Jiuxuan Zhang\*,<sup>a</sup> Hong Jiang,<sup>a</sup> Rizhi Chen<sup>a</sup>

<sup>a</sup> State Key Laboratory of Materials-Oriented Chemical Engineering, Nanjing Tech University,  
Nanjing, Jiangsu, P.R. China, 211816

\*Corresponding author. [jiuxuanz@njtech.edu.cn](mailto:jiuxuanz@njtech.edu.cn)

Number of pages: 20

Number of Supporting Figures: 13

Number of Supporting Tables: 4

## Chemicals

Cobalt nitrate hexahydrate ( $\text{Co}(\text{NO}_3)_2 \cdot 6\text{H}_2\text{O}$ , 99.99%) and 2-methylimidazole (2-MeIm 99%) were purchased from Sigma-Aldrich. Palladium acetate ( $\text{Pd}(\text{OAc})_2$ , Pd > 47%) was purchased from Sin-platinum Metals Co., Ltd., China. Methanol ( $\text{MeOH}$ , HPLC pure) and acetone ( $\text{C}_3\text{H}_6\text{O}$ , AR) were purchased from Yonghua Chemical Co., Ltd., China. Nitric acid (AR) was purchased from Shanghai Lingfeng Chemical Reagent Co., Ltd., China. Phenol ( $\text{C}_6\text{H}_5\text{OH}$ , AR) was purchased from Sinopharm Chemical Reagent Co., Ltd., China. All the chemicals were used without further purification.

## Characterization

Powder X-ray diffraction (XRD) patterns were obtained using a Rigaku RINT-2000 X-ray diffractometer and Cu-K $\alpha$  radiation (40 kV, 40 mA) at a scanning rate of 20°/min. A Jobin Yvon HR Evo Raman spectrometer was used to collect Raman spectra. A Hitachi S-4800 instrument was used to obtain field-emission scanning electron microscopy (FESEM) images. A FEI Tecnai G2 F30S-Twin transmission electron microscope was used to obtain high-resolution transmission electron microscopy (HRTEM) images, high-angle annular dark-field scanning TEM (HAADF-STEM) images, and elemental mappings. A Micromeritics ASAP 2020 instrument was used for nitrogen adsorption–desorption experiments, and the pore size distribution curves were obtained by the Barret-Joyner-Halenda method (BJH). A Thermo ESCALAB 250Xi instrument (equipped with a monochromatized Al-K $\alpha$  radiation,  $h\nu = 1486.6$  eV) was used for X-ray photoelectron spectroscopy (XPS) measurements. The peak deconvolution was carried out in XPSPEAK, and the C 1s peak (284.6 eV) was used to calibrate the binding energies. Inductively coupled plasma emission spectroscopy (ICP-AES, Optima 2000DV) was used to determine the

metal content. Thermogravimetric analysis (TGA) was conducted on a TG analyzer (NETZSCH STA449 F3) under nitrogen atmosphere from ambient temperature to 800 °C with a heating rate of 10 °C/min. CO<sub>2</sub>-temperature programmed desorption (CO<sub>2</sub>-TPD, BELCAT-A) was used to determine the basic strength and basicity of the samples. Elemental analysis was studied on a CHN elemental analyzer (Vario EL cube).

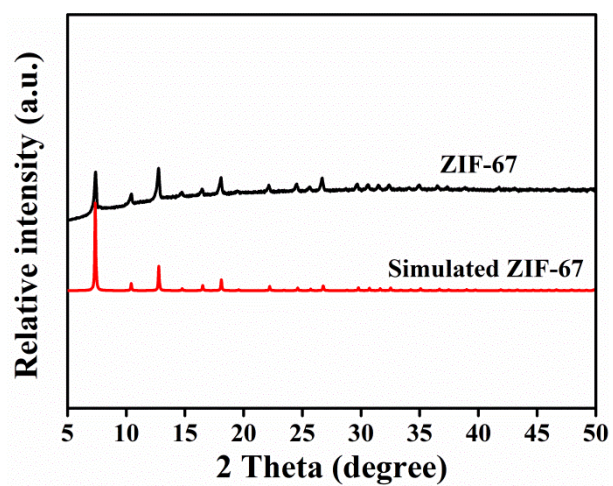

**Fig. S1** XRD pattern of ZIF-67

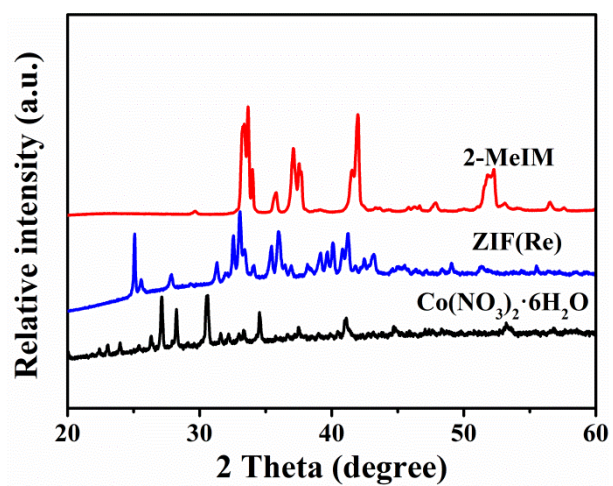

Fig. S2 XRD patterns of ZIF(Re) and precursors

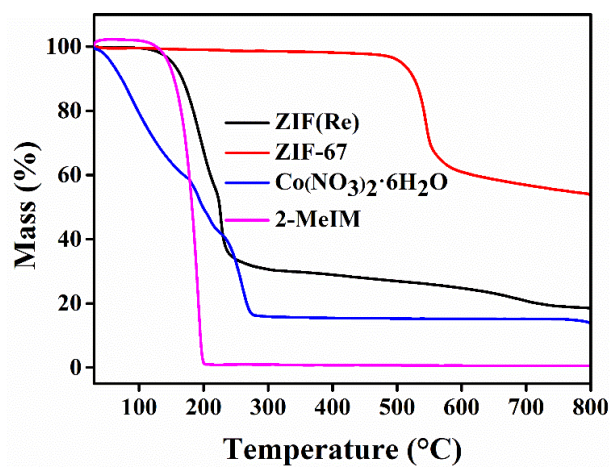

**Fig. S3** TG curves of raw materials, ZIF-67, and ZIF (Re)

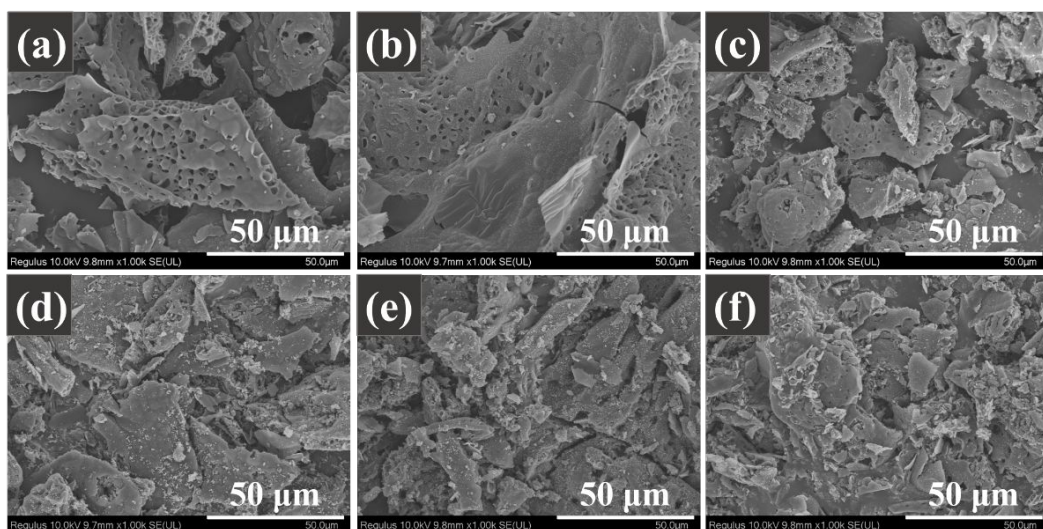

**Fig. S4** FESEM images of Co@CN-T (a= 550, b= 600, c= 700, d= 800, e= 900, f= 1000 °C)

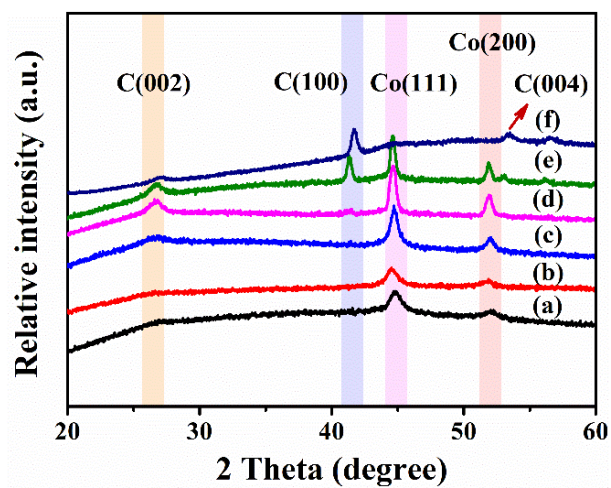

**Fig. S5** XRD patterns of Co@CN-T (a= 550, b= 600, c= 700, d= 800, e= 900, f= 1000 °C)



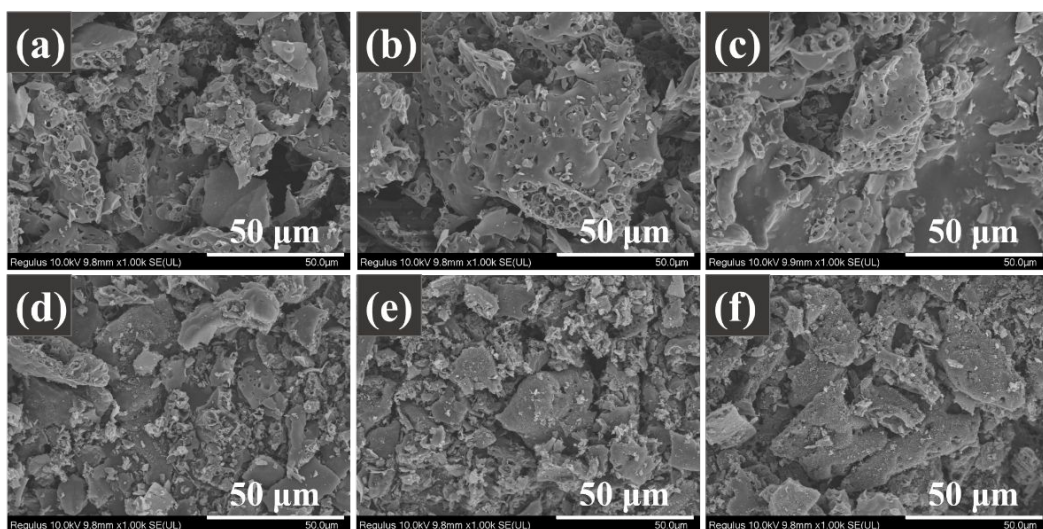

**Fig. S6** FESEM images of Pd@CN-T (a= 550, b= 600, c= 700, d= 800, e= 900, f= 1000 °C)

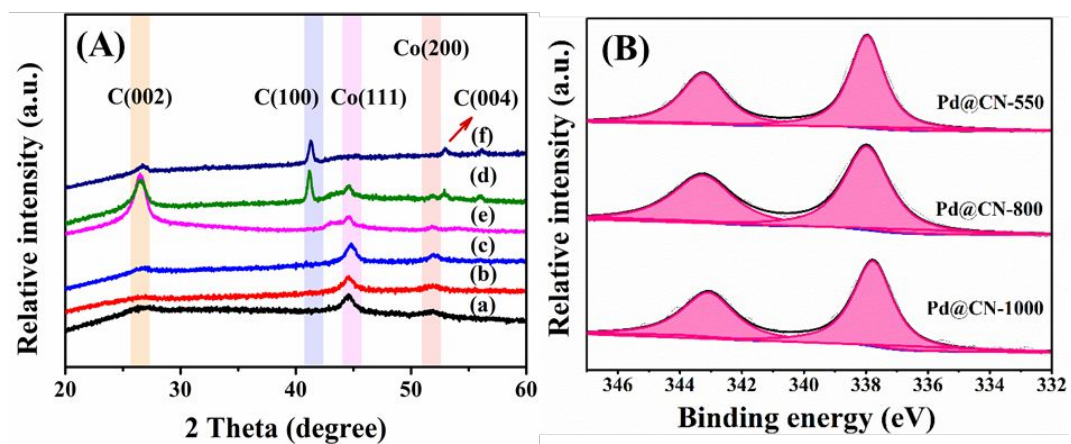

**Fig. S7** XRD patterns of Pd@CN-T (a= 550, b= 600, c= 700, d= 800, e= 900, f= 1000 °C) (A) and

Pd 3d spectra of Pd@CN (B)

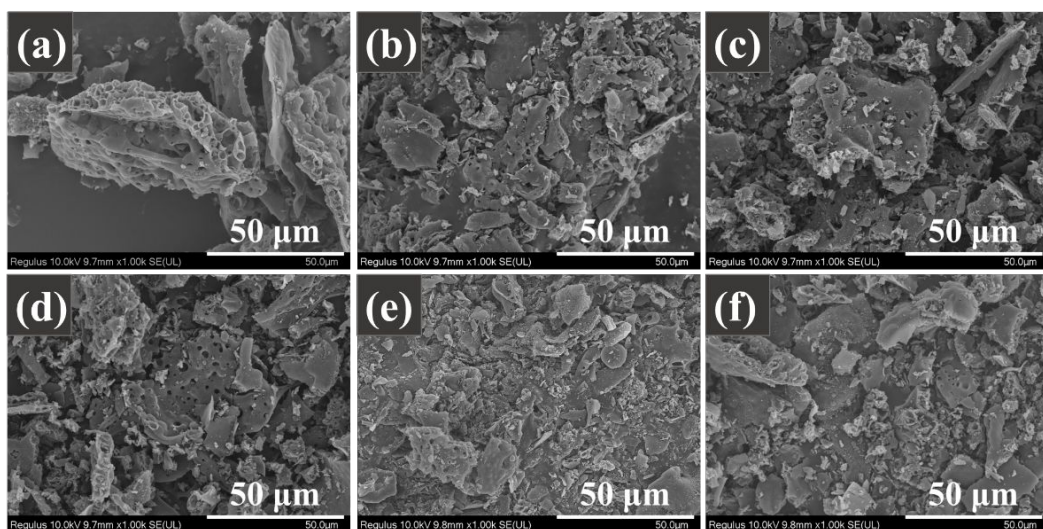

**Fig. S8** FESEM images of Pd@CN-800-t (a= 0, b= 30, c= 60, d= 90, e= 120, f= 180 min)

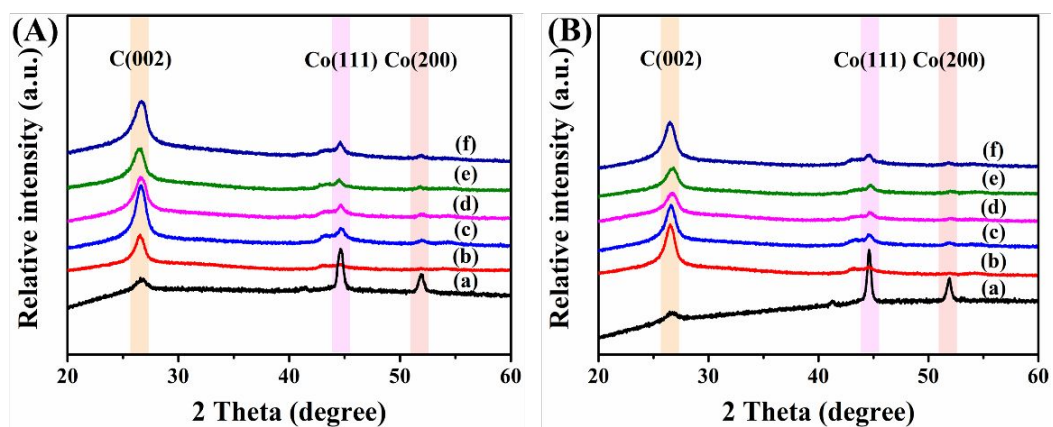

**Fig. S9** XRD patterns of CN-800-t (A) and Pd@CN-800-t (B)

(a= 0, b= 15, c= 30, d= 60, e= 120, f= 180 min)

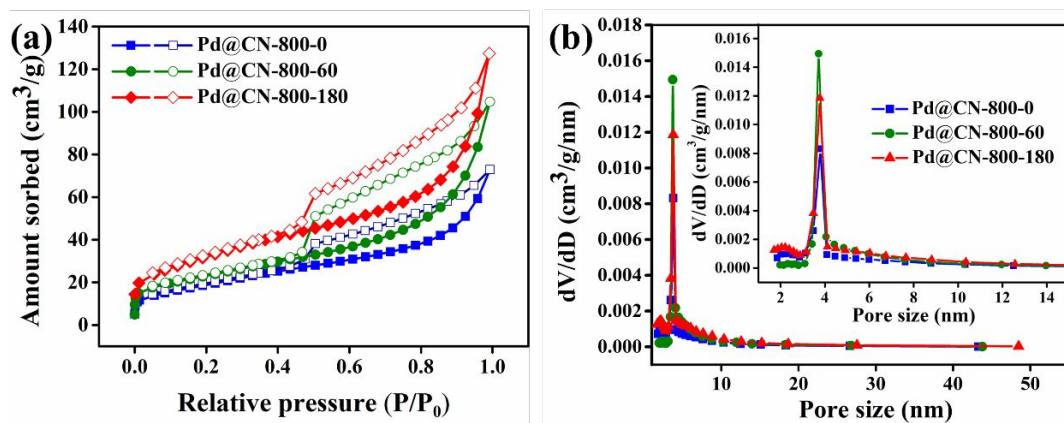

Fig. S10 Nitrogen adsorption-desorption isotherms (a) and pore size distribution curves (b) of

Pd@CN-800

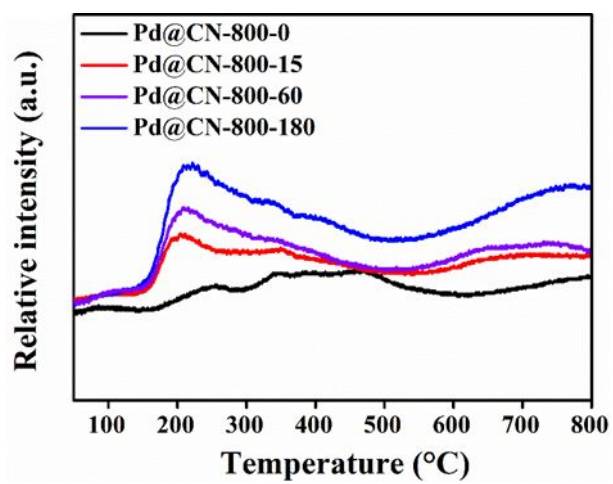

Fig. S11 CO<sub>2</sub>-TPD spectra of Pd@CN-800

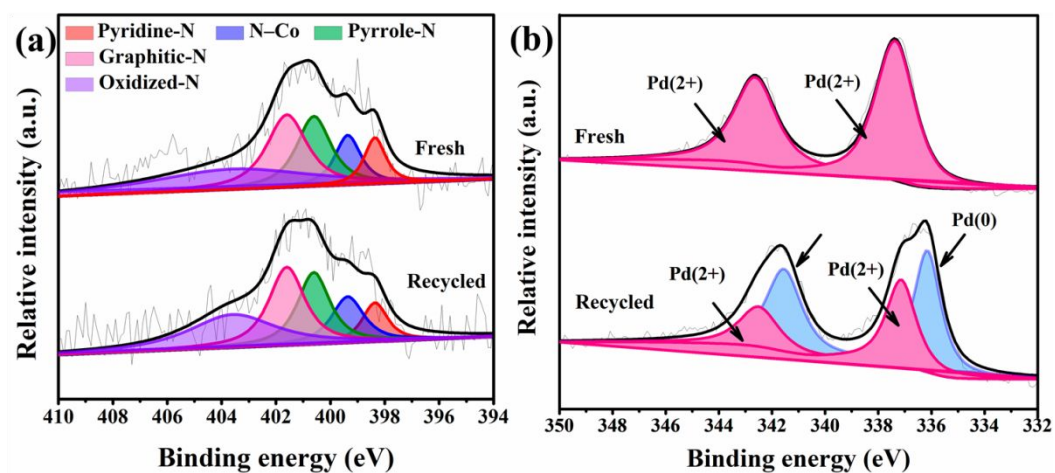

**Fig. S12** N 1s spectra (a) and Pd 3d spectra (b) of fresh and recovered Pd@CN-800-60

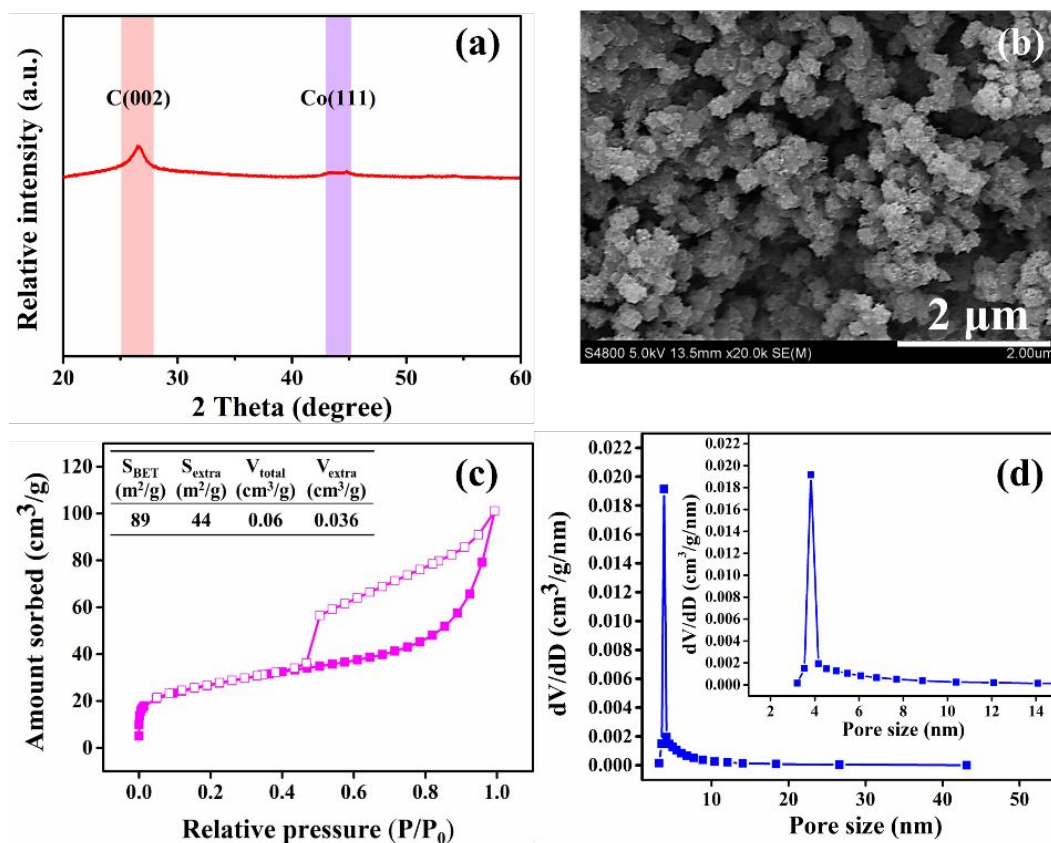

**Fig. S13** XRD pattern (a), FESEM image (b), N<sub>2</sub> sorption isotherms (c), pore size distribution curve (d) of Pd@CN(67)-800-60



**Table S1** Productivity of ZIFs and the corresponding derived carbon materials after different stages

| Samples | Crystallization (g) | Carbonization (g) | Pickling (g) | Pd loading (g) |
|---------|---------------------|-------------------|--------------|----------------|
| ZIF(Re) | 9.04                | 1.74              | 1.56         | 1.50           |
| ZIF-67  | 1.20                | 0.74              | 0.46         | 0.44           |

**Table S2** Contents of elements in ZIFs and CN-800

| Samples    | C (wt. %) <sup>a</sup> | N (wt. %) <sup>a</sup> | H (wt. %) <sup>a</sup> | Co (wt. %) <sup>b</sup> |
|------------|------------------------|------------------------|------------------------|-------------------------|
| ZIF-67     | 43.1                   | 25.4                   | 5.0                    | 27.9                    |
| ZIF(Re)-1  | 46.2                   | 31.0                   | 5.0                    | 5.0                     |
| ZIF(Re)-2  | 46.2                   | 31.0                   | 6.1                    | 5.0                     |
| ZIF(Re)-3  | 46.2                   | 30.9                   | 6.4                    | 5.1                     |
| CN(67)-800 | 90.8                   | 1.1                    | 2.3                    | 0.10                    |
| CN(Re)-800 | 91.0                   | 1.0                    | 3.2                    | 0.08                    |

<sup>a</sup> measured by a CHN elemental analyzer, <sup>b</sup> measured by ICP

**Table S3** Surface areas and total pore volumes of Co@CN-800, CN-800 and Pd@CN-800

| Samples       | $S_{\text{BET}}$<br>( $\text{m}^2/\text{g}$ ) | $S_{\text{extra}}$<br>( $\text{m}^2/\text{g}$ ) | $S_{\text{extra}}/S_{\text{BET}}$ | $V_{\text{total}}$<br>( $\text{cm}^3/\text{g}$ ) | $V_{\text{extra}}$<br>( $\text{cm}^3/\text{g}$ ) | $V_{\text{extra}}/V_{\text{total}}$ |
|---------------|-----------------------------------------------|-------------------------------------------------|-----------------------------------|--------------------------------------------------|--------------------------------------------------|-------------------------------------|
| ZIF(Re)       | 5                                             | 1                                               | 0.20                              | 0.004                                            | 0.002                                            | 0.50                                |
| Co@CN-800     | 116                                           | 56                                              | 0.48                              | 0.16                                             | 0.12                                             | 0.75                                |
| CN-800        | 175                                           | 62                                              | 0.35                              | 0.19                                             | 0.13                                             | 0.68                                |
| Pd@CN-800-0   | 58                                            | 50                                              | 0.86                              | 0.11                                             | 0.10                                             | 0.91                                |
| Pd@CN-800-60  | 74                                            | 63                                              | 0.85                              | 0.16                                             | 0.15                                             | 0.94                                |
| Pd@CN-800-180 | 107                                           | 75                                              | 0.70                              | 0.20                                             | 0.18                                             | 0.89                                |

$$S_{\text{extra}} = S_{\text{BET}} - S_{\text{mic}} \quad (1)$$

$$V_{\text{extra}} = V_{\text{total}} - V_{\text{mic}} \quad (2)$$

**Table S4** Contents of elements in Pd@CN-800

| Samples       | C<br>(wt. %) <sup>a</sup> | N<br>(wt. %) <sup>a</sup> | H<br>(wt. %) <sup>a</sup> | Pd<br>(wt. %) <sup>b</sup> | Co<br>(wt. %) <sup>b</sup> |
|---------------|---------------------------|---------------------------|---------------------------|----------------------------|----------------------------|
| Pd@CN-800-0   | 70.62                     | 1.13                      | 2.36                      | 0.96                       | 23.8                       |
| Pd@CN-800-15  | 92.88                     | 0.86                      | 2.09                      | 1.52                       | 0.57                       |
| Pd@CN-800-30  | 90.10                     | 1.31                      | 2.08                      | 1.94                       | 0.18                       |
| Pd@CN-800-60  | 87.70                     | 1.67                      | 1.92                      | 2.13                       | 0.20                       |
| Pd@CN-800-120 | 88.54                     | 1.70                      | 2.24                      | 2.06                       | 0.23                       |
| Pd@CN-800-180 | 89.49                     | 1.44                      | 1.76                      | 1.97                       | 0.22                       |

<sup>a</sup> measured by a CHN elemental analyzer, <sup>b</sup> measured by ICP
